# Supplementary material for: Divergences in gene repertoire among the reference Prevotella genomes derived from distinct body sites of human
Source: PubMed Central journal article supplement (PMC4359502; doi:10.1186/s12864-015-1350-6), 2015-03-05
Supplement: 12864_2015_1350_MOESM1_ESM.pdf [file 12864_2015_1350_MOESM1_ESM.pdf]

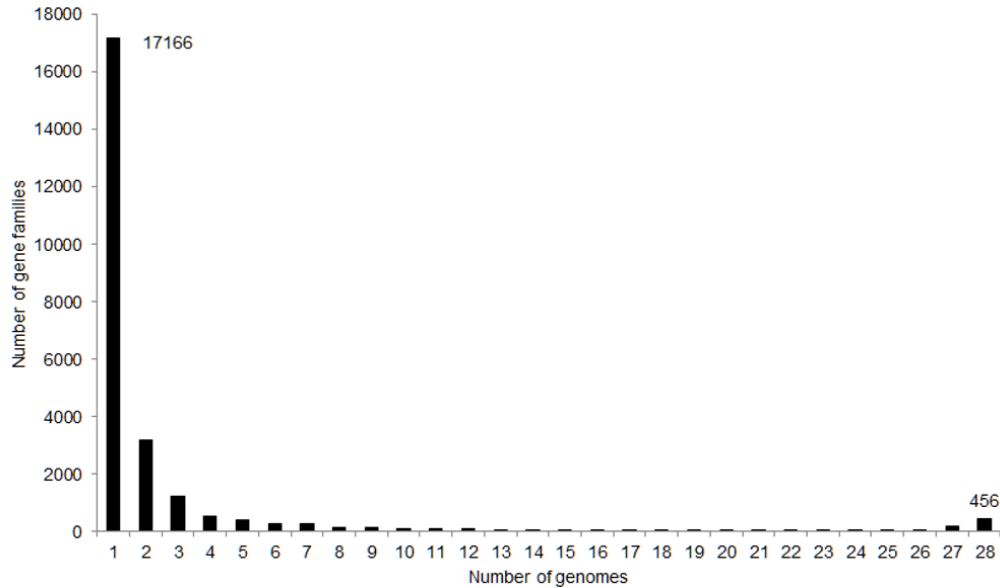

**Additional File 1: Figure S1 - The gene family frequency spectrum for 28 *Prevotella* genomes.** Bars represent the number of orthologous gene families belonging to singletons (17166), flexible genome (7263) and core genome (456).
