# Supplementary material for: Divergences in gene repertoire among the reference Prevotella genomes derived from distinct body sites of human
Source: PubMed Central journal article supplement (PMC4359502; doi:10.1186/s12864-015-1350-6), 2015-03-05
Supplement: 12864_2015_1350_MOESM6_ESM.pdf [file 12864_2015_1350_MOESM6_ESM.pdf]

**Additional File 6: Table S4** Details of genes exclusively absent from each *Prevotella* strain.

| Niche      | Organism name                          | Protein Id (EMBL)                                      | Gene Description                                               | COG Id  | COG Class |
|------------|----------------------------------------|--------------------------------------------------------|----------------------------------------------------------------|---------|-----------|
| GIT        | <i>P.copri</i> DSM 18205               | EFC74560.1                                             | phosphopyruvate hydratase                                      | COG0148 | G         |
|            |                                        | EFM00833.1                                             | chaperone protein ClpB                                         | COG0542 | O         |
|            |                                        | EEX52238.1                                             | arabinose 5-phosphate isomerase                                | COG0794 | M         |
|            |                                        | EFZ37143.1                                             | undecaprenyl-diphosphatase UppP                                | COG1968 | V         |
|            |                                        | EFB93670.1                                             | rubredoxin                                                     | COG1773 | C         |
|            | <i>P.stercorea</i> DSM 18206           | EGC86300.1                                             | 3-deoxy-8-phosphooctulonate synthase                           | COG2877 | M         |
|            |                                        | AEA20996.1                                             | GDP-mannose 4,6-dehydratase                                    | COG1089 | M         |
|            |                                        | EGC86225.1                                             | 3-deoxy-D-manno-octulosonate cytidyltransferase                | COG1212 | M         |
|            |                                        | EFB32658.1                                             | GDP-L-fucose synthase                                          | COG0451 | MG        |
| AEA20365.1 | conserved hypothetical protein         | -                                                      | -                                                              |         |           |
| SKIN       | <i>P.bergensis</i> DSM 17361           | EHJ42052.1                                             | pyridine nucleotide-disulfide oxidoreductase family protein    | COG2509 | R         |
|            |                                        | EFB92986.1                                             | class II glutamine amidotransferase                            | COG0034 | F         |
| UGT        | <i>P.amnii</i> CRIS 21A-A              | EFU29670.1                                             | large conductance mechanosensitive channel protein             | COG1970 | M         |
|            |                                        | EID33434.1                                             | IgA Peptidase M64                                              | -       | -         |
|            | <i>P.buccalis</i> ATCC 35310           | EFB33325.1                                             | 3-deoxy-manno-octulosonate-8-phosphatase                       | COG1778 | R         |
|            |                                        | EFB93929.1                                             | ribosomal protein L30                                          | COG1841 | J         |
|            |                                        | EFB32494.1                                             | ribosomal protein L27                                          | COG0211 | J         |
|            | <i>P.disiens</i> FB035-09AN            | EEX53829.1                                             | glycine-tRNA ligase                                            | COG0423 | J         |
|            | <i>P.oralis</i> ATCC 33269             | EFN92164.1                                             | firmicute fructose-1,6-bisphosphatase                          | COG3855 | G         |
|            |                                        | EFB34908.1                                             | 2-oxoglutarate oxidoreductase, beta subunit                    | COG1013 | C         |
|            |                                        | EFU31583.1                                             | 2-oxoglutarate ferredoxin oxidoreductase subunit gamma         | COG1014 | C         |
|            |                                        | EFB33144.1                                             | branched-chain-amino-acid transaminase                         | COG0115 | EH        |
| EFU31581.1 |                                        | 2-oxoglutarate ferredoxin oxidoreductase subunit alpha | COG0674                                                        | C       |           |
| ORAL       | <i>P.buccae</i> D17                    | EFC69904.1                                             | cytochrome D ubiquinol oxidase, subunit II                     | COG1294 | C         |
|            |                                        | EFA98590.1                                             | NADH:ubiquinone oxidoreductase, Na(+)-translocating, A subunit | COG1726 | C         |
|            |                                        | EFU30246.1                                             | DNA polymerase III, gamma/tau subunit DnaX                     | COG2812 | L         |
|            |                                        | ADK96346.1                                             | adenylate kinase                                               | COG0563 | F         |
|            |                                        | EGQ17448.1                                             | ATP-dependent protease LonB                                    | COG0466 | O         |
|            |                                        | EFB93293.1                                             | ribosomal protein L20                                          | COG0292 | J         |
|            |                                        | EFB33331.1                                             | GTP-binding protein LepA                                       | COG0481 | M         |
|            |                                        | EGC85472.1                                             | phosphotransferase enzyme family                               | COG1660 | R         |
|            |                                        | EGC86374.1                                             | citrate transporter                                            | COG1055 | P         |
|            | <i>P.marshii</i> DSM 16973             | EGQ11584.1                                             | rubrerythrin                                                   | COG1592 | C         |
|            | <i>P.melaninogenica</i> D18            | EFN90746.1                                             | CTP synthase                                                   | COG0504 | F         |
|            |                                        | EFB32999.1                                             | DNA polymerase III, alpha subunit                              | COG0587 | L         |
|            | <i>P.oris</i> F0302                    | EFZ36112.1                                             | excision endonuclease subunit UvrA                             | COG0178 | L         |
|            |                                        | EFA97784.1                                             | peptidase C1-like family protein                               | COG3579 | E         |
|            |                                        | EFB34185.1                                             | D-phosphoglycerate dehydrogenase                               | COG0111 | HE        |
|            |                                        | EFM02180.1                                             | conserved hypothetical protein                                 | COG4198 | S         |
|            |                                        | EFB92161.1                                             | putative phosphoserine transaminase                            | COG1932 | HE        |
|            | <i>P.oulorum</i> F0390                 | EFC74778.1                                             | glutamate dehydrogenase                                        | COG0334 | E         |
|            |                                        | EFU31314.1                                             | 3-oxoacyl-(acyl-carrier-protein) synthase II                   | COG0304 | IQ        |
|            |                                        | EFB33724.1                                             | maltodextrin phosphorylase                                     | COG0058 | G         |
|            |                                        | EFA97313.1                                             | ABC transporter, ATP-binding protein                           | COG1137 | R         |
|            | <i>P.sp. oral taxon 317 str. F0108</i> |                                                        |                                                                |         |           |
|            | <i>P.sp. oral taxon 472 str. F0295</i> |                                                        |                                                                |         |           |

|                                        |            |                                                     |         |    |
|----------------------------------------|------------|-----------------------------------------------------|---------|----|
|                                        | EFA91775.1 | carboxynorspermidine decarboxylase                  | COG0019 | E  |
|                                        | EFZ38106.1 | fumarate reductase subunit B                        | COG0479 | C  |
|                                        | EFC74986.1 | alpha-glucosidase                                   | -       | -  |
| <i>P.sp. oral taxon 299 str. F0039</i> | EFA97265.1 | ribosomal protein L17                               | COG0203 | J  |
|                                        | AEA21872.1 | S-ribosylhomocysteinase LuxS                        | COG1854 | T  |
|                                        | EGQ18946.1 | 50S ribosomal protein L31                           | COG0254 | J  |
|                                        | EFC67472.1 | conserved hypothetical protein                      | -       | -  |
|                                        | EFA98549.1 | 1,4-dihydroxy-2-naphthoate octaprenyltransferase    | COG1575 | H  |
|                                        | EFC75848.1 | 3'-5' exonuclease domain protein                    | COG0349 | J  |
|                                        | EFU30634.1 | 5'/3'-nucleotidase SurE                             | COG0496 | R  |
|                                        | EGQ14933.1 | 50S ribosomal protein L29                           | -       | -  |
|                                        | EFM02034.1 | 50S ribosomal protein L9                            | COG0359 | J  |
|                                        | EFC76794.1 | acetyltransferase                                   | COG0456 | R  |
|                                        | EGV30218.1 | adenylate cyclase                                   | COG2954 | S  |
|                                        | EFV05134.1 | aminodeoxychorismate lyase                          | COG1559 | R  |
|                                        | EFA98345.1 | ApbE family protein                                 | COG1477 | H  |
|                                        | EGQ23346.1 | arginine repressor                                  | COG1438 | K  |
|                                        | EFU29992.1 | ATP-dependent Clp protease ATP-binding subunit ClpC | COG0542 | O  |
|                                        | EFU30366.1 | band 7/Mec-2 family protein                         | COG0330 | O  |
|                                        | EFL47097.1 | biotin-requiring enzyme                             | COG4770 | I  |
|                                        | EFC74124.1 | carboxyl- protease                                  | COG0793 | M  |
|                                        | EEX52666.1 | cardiolipin synthase                                | COG1502 | I  |
|                                        | EGQ16917.1 | cardiolipin synthetase                              | COG1502 | I  |
|                                        | EFC74084.1 | cell division protein FtsA                          | COG0849 | D  |
|                                        | EFV05759.1 | cyclic nucleotide-binding domain protein            | COG0664 | T  |
|                                        | EGQ21498.1 | cytidine deaminase                                  | COG0295 | F  |
|                                        | EFA97739.1 | deoxyribose-phosphate aldolase                      | COG0274 | F  |
|                                        | EGQ17357.1 | dihydrodipicolinate synthase                        | COG0329 | EM |
| <i>P.tanneriae ATCC 51259</i>          | EID33252.1 | DNA polymerase III, delta subunit                   | COG0470 | L  |
|                                        | EFA92488.1 | DNA polymerase III, delta subunit                   | COG1466 | L  |
|                                        | EGC20754.1 | DNA primase                                         | COG0358 | L  |
|                                        | EFU31466.1 | DNA processing protein DprA                         | COG0758 | LU |
|                                        | EFB36474.1 | DNA repair protein RecN                             | COG0497 | L  |
|                                        | EEX51824.1 | DNA-directed DNA polymerase III beta subunit        | COG0592 | L  |
|                                        | EFA98000.1 | efflux ABC transporter, permease protein            | COG2177 | D  |
|                                        | EGC86910.1 | efflux transporter, RND family, MFP subunit         | COG1566 | V  |
|                                        | EGC85489.1 | endonuclease/exonuclease/phosphatase family protein | COG2374 | R  |
|                                        | EGQ18182.1 | endonuclease/exonuclease/phosphatase family protein | -       | -  |
|                                        | EFA91710.1 | exodeoxyribonuclease VII, large subunit             | COG1570 | L  |
|                                        | EFV05431.1 | Fe-S oxidoreductase                                 | COG0621 | J  |
|                                        | AEA22275.1 | FHA domain protein                                  | -       | -  |
|                                        | EFA97916.1 | gliding motility-associated protein GldE            | COG1253 | R  |
|                                        | EFC74972.1 | glutamine amidotransferase subunit PdxT             | COG0311 | H  |
|                                        | EFB35041.1 | glutamine cyclotransferase-related protein          | COG2234 | R  |
|                                        | EFC76889.1 | glutathione peroxidase                              | COG0386 | O  |
|                                        | EFB33431.1 | glycosyl hydrolase, family 25                       | COG3757 | M  |
|                                        | EFB32745.1 | glycosyl transferase, group 1 family                | COG0438 | M  |
|                                        | EEX54059.1 | group 2 glycosyl transferase                        | COG0463 | M  |
|                                        | EGQ17815.1 | GSCFA family protein                                | -       | -  |
|                                        | EFA91757.1 | HD domain protein                                   | COG1418 | R  |

|            |                                                               |         |    |
|------------|---------------------------------------------------------------|---------|----|
| EFB31567.1 | HDIG domain protein                                           | COG1480 | R  |
| EFC73587.1 | HimA protein                                                  | COG0776 | L  |
| EFL45536.1 | hydrolase, TatD family                                        | COG0084 | L  |
| EFB33339.1 | inner membrane protein OxaA                                   | COG0706 | U  |
| EFC75811.1 | iron compound ABC transporter, permease protein               | COG4139 | H  |
| EFA91929.1 | lipid kinase, YegS/BmrU family                                | COG1597 | IR |
| EFC73130.1 | lipoate-protein ligase B                                      | COG1235 | R  |
| EFC72943.1 | lipoprotein                                                   | COG1196 | D  |
| EFC75823.1 | lipoprotein                                                   | COG3147 | S  |
| EFB30907.1 | mandelate racemase/muconate lactonizing enzyme family protein | COG4948 | MR |
| EFN92151.1 | mannosyl-glycoprotein endo-beta-N-acetylglucosaminidase       | COG1705 | NU |
| EFC72248.1 | membrane protein                                              | COG0392 | S  |
| EFC75286.1 | membrane protein                                              | COG4591 | M  |
| EFC75604.1 | membrane protein                                              | COG0628 | R  |
| EFC76492.1 | metallo-beta-lactamase family protein                         | COG0491 | R  |
| EFZ37246.1 | MOP/MATE family multidrug-resistance efflux pump              | COG0534 | V  |
| EID33320.1 | MORN repeat protein                                           | COG4642 | S  |
| EFC74704.1 | MotA/TolQ/ExbB proton channel family protein                  | COG0811 | U  |
| EFB33091.1 | multidrug resistance protein, FusA/NodT family                | COG1538 | MU |
| EFZ35886.1 | Na(+)-translocating NADH-quinone reductase subunit C          | COG2869 | C  |
| EEX18935.1 | Na/Pi cotransporter family protein                            | COG1283 | P  |
| EFB31922.1 | NAD dependent epimerase/reductase-related protein             | COG0451 | MG |
| EGQ12105.1 | NADH dehydrogenase subunit J                                  | COG0839 | C  |
| EGQ16369.1 | naphthoate synthase                                           | COG0447 | H  |
| EFB34324.1 | octaprenyl-diphosphate synthase                               | COG0142 | H  |
| EFC74994.1 | O-methyltransferase family protein                            | COG4122 | R  |
| EFB92717.1 | outer membrane assembly lipoprotein YfiO                      | COG4105 | R  |
| EFB32498.1 | outer membrane protein, OMP85 family                          | COG4775 | M  |
| EFB93480.1 | PAP2 family protein                                           | -       | -  |
| EFU30040.1 | patatin family phospholipase                                  | COG4667 | R  |
| EFA92212.1 | penicillin-binding protein, transpeptidase domain protein     | COG0768 | M  |
| EFC76200.1 | peptidase, M16 family                                         | COG0612 | R  |
| EFB93678.1 | peptidase, M23 family                                         | COG0739 | M  |
| EFC75739.1 | peptidyl-prolyl cis-trans isomerase                           | -       | -  |
| AEA20066.1 | permease, YjgP/YjgQ family                                    | COG0795 | R  |
| EFC74938.1 | phenylacetic acid degradation-related protein                 | COG2050 | Q  |
| EFB32504.1 | polysaccharide export protein, BexD/CtrA/VexA family          | COG1596 | M  |
| EFB93212.1 | potassium uptake protein, TrkH family                         | COG0168 | P  |
| EGQ15145.1 | preprotein translocase                                        | COG1862 | U  |
| EGQ15221.1 | primosome assembly protein PriA                               | COG1198 | L  |
| EFV04290.1 | prolipoprotein diacylglycerol transferase                     | COG0682 | M  |
| EFA97696.1 | protein-export membrane protein SecD                          | COG0342 | U  |
| EFB31615.1 | putative cell division protein FtsQ                           | -       | -  |
| AEA20944.1 | putative membrane protein                                     | -       | -  |
| EFB92356.1 | putative tetraacyldisaccharide-1-P 4'-kinase                  | COG1663 | M  |
| EFC76991.1 | putative TPR domain protein                                   | -       | -  |
| EGQ21579.1 | pyridoxal biosynthesis lyase PdxS                             | COG0214 | H  |
| EID33506.1 | rare lipoprotein B family protein                             | -       | -  |

|            |                                                |         |    |
|------------|------------------------------------------------|---------|----|
| EFB32542.1 | RecF protein                                   | COG1195 | L  |
| EFB93251.1 | RNA methyltransferase, RsmE family             | COG1385 | S  |
| EFA96944.1 | RNA polymerase sigma-54 factor                 | COG1508 | K  |
| EFB92316.1 | rod shape-determining protein MreC             | COG1792 | M  |
| EFU29995.1 | septum formation protein Maf                   | COG0424 | D  |
| ADK95980.1 | Ser/Thr phosphatase family protein             | COG0737 | F  |
| EFC75794.1 | shikimate dehydrogenase                        | COG0169 | E  |
| EFZ38209.1 | shikimate kinase                               | COG0703 | E  |
| ADK95333.1 | sigma-54 interaction domain protein            | COG2204 | T  |
| EFC67405.1 | sigma-70, region 4 family                      | COG1595 | K  |
| EEX18471.1 | signal peptide peptidase SppA, 67K type        | COG0616 | OU |
| EEX51805.1 | sodium:solute symporter family protein         | COG0591 | ER |
| EFC75605.1 | thymidine kinase                               | COG1435 | F  |
| AEA20380.1 | translocator protein, LysE family              | COG1280 | E  |
| EGC86277.1 | transport energizing protein, ExbD/TolR family | COG0848 | U  |
| EFA92087.1 | transporter, CPA2 family                       | COG0475 | P  |
| EGQ17955.1 | trigger factor                                 | COG0544 | O  |
| EFC76508.1 | tRNA pseudouridine synthase A                  | COG0101 | J  |
| EGQ17140.1 | UDP-N-acetylglucosamine 2-epimerase            | COG0381 | M  |
| EGQ13350.1 | YitT family protein                            | COG1284 | S  |
| EFA93064.1 | hypothetical protein                           | COG1253 | R  |
| EGQ16766.1 | hypothetical protein                           | COG4485 | S  |
| EGV34473.1 | hypothetical protein                           | -       | -  |
| EGC85215.1 | hypothetical protein                           | -       | -  |
| EFV04101.1 | hypothetical protein                           | -       | -  |
| EGC85722.1 | hypothetical protein                           | -       | -  |
| EEX52279.1 | hypothetical protein                           | -       | -  |
| EGQ16284.1 | hypothetical protein                           | -       | -  |
| EFU31816.1 | hypothetical protein                           | -       | -  |
| EFV03578.1 | conserved hypothetical protein                 | COG1738 | S  |
| EFV05107.1 | conserved hypothetical protein                 | COG0795 | R  |
| EEX52500.1 | conserved hypothetical protein                 | COG5146 | H  |
| EEX52791.1 | conserved hypothetical protein                 | COG1739 | S  |
| EFB93539.1 | conserved hypothetical protein                 | COG4980 | R  |
| AEA21846.1 | conserved hypothetical protein                 | COG2957 | E  |
| EFB35318.1 | conserved hypothetical protein                 | COG3150 | R  |
| EFU30209.1 | conserved hypothetical protein                 | -       | -  |
| EFU29947.1 | conserved hypothetical protein                 | -       | -  |
| EFA97114.1 | conserved hypothetical protein                 | -       | -  |
| EFV03296.1 | conserved hypothetical protein                 | -       | -  |
| EFB30761.1 | conserved hypothetical protein                 | -       | -  |
| EFN91071.1 | conserved hypothetical protein                 | -       | -  |
| EEX18957.1 | conserved hypothetical protein                 | -       | -  |
| EFV05576.1 | conserved hypothetical protein                 | -       | -  |
| EFA92802.1 | conserved hypothetical protein                 | -       | -  |

GIT: Gastrointestinal Tract, Oral: Oral Cavity, UGT: Urogenital tract.
