# Supplementary material for: Divergences in gene repertoire among the reference Prevotella genomes derived from distinct body sites of human
Source: PubMed Central journal article supplement (PMC4359502; doi:10.1186/s12864-015-1350-6), 2015-03-05
Supplement: 12864_2015_1350_MOESM7_ESM.pdf [file 12864_2015_1350_MOESM7_ESM.pdf]

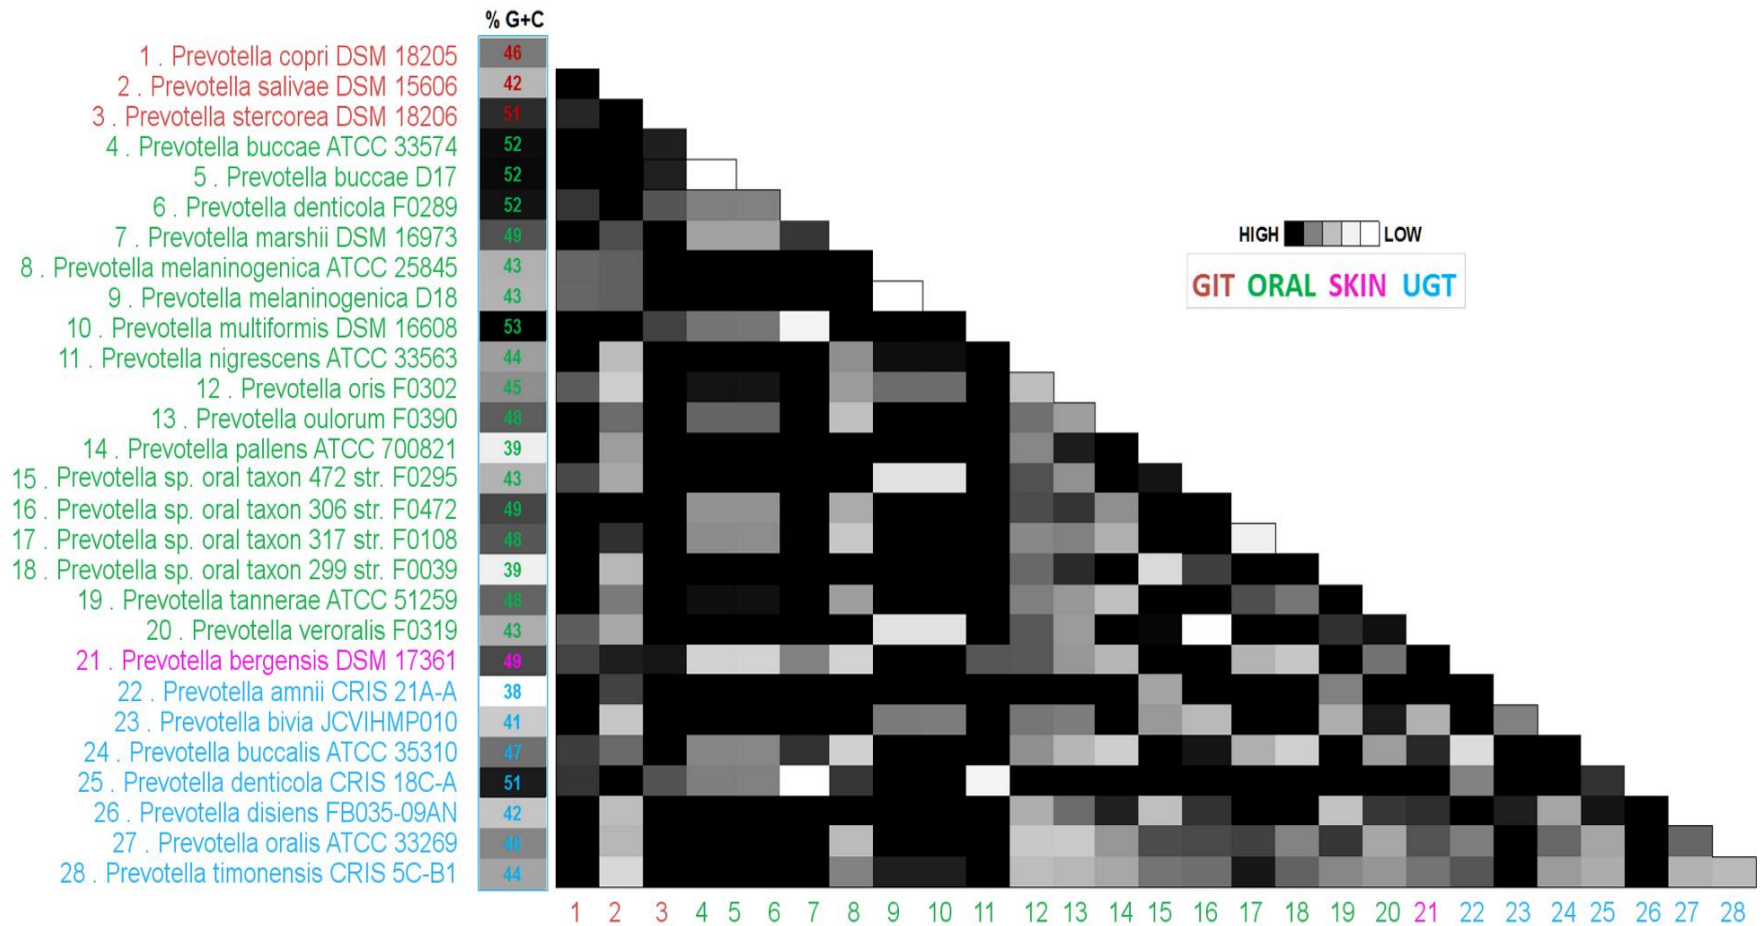

**Additional File 7: Figure S3** Heatmap of codon usage distances between core genomes of *Prevotella* strains.
