# Supplementary material for: Divergences in gene repertoire among the reference Prevotella genomes derived from distinct body sites of human
Source: PubMed Central journal article supplement (PMC4359502; doi:10.1186/s12864-015-1350-6), 2015-03-05
Supplement: 12864_2015_1350_MOESM8_ESM.pdf [file 12864_2015_1350_MOESM8_ESM.pdf]

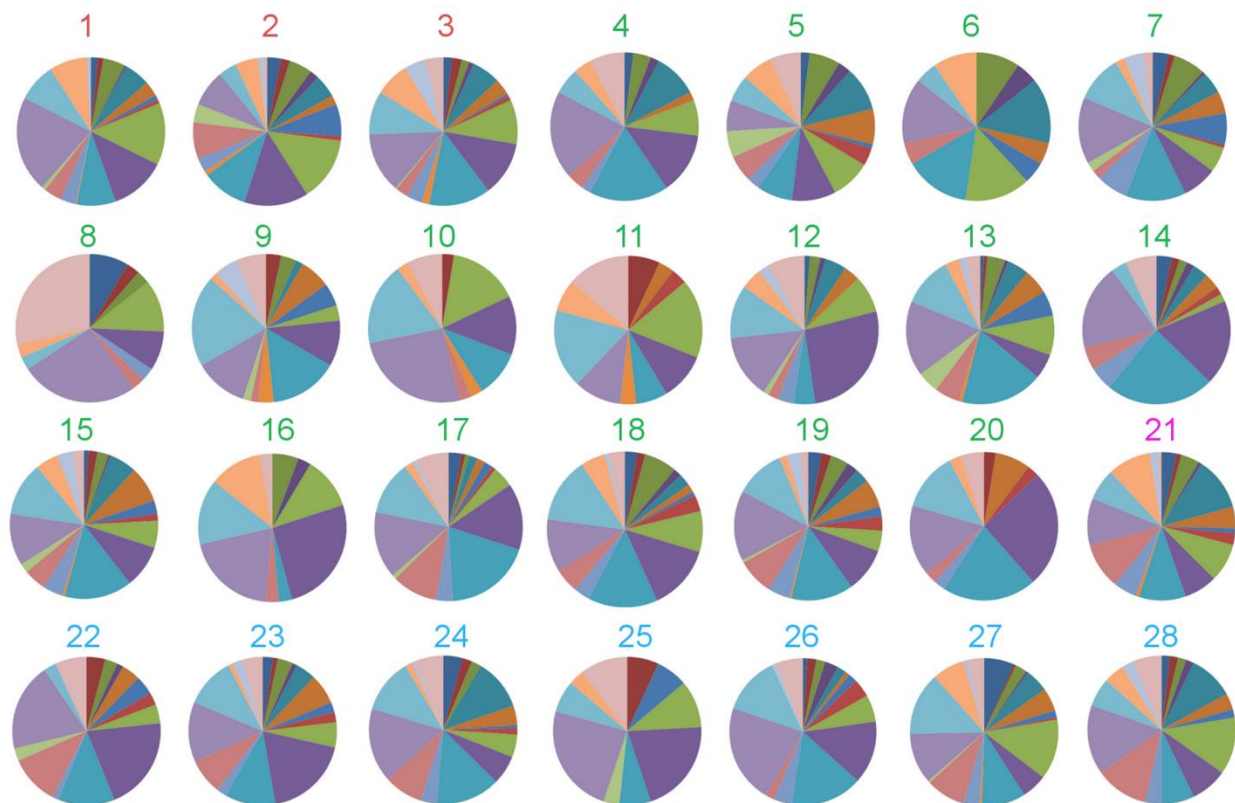

- C - Energy production and conversion
- D - Cell cycle control, cell division, chromosome partitioning
- E - Amino acid transport and metabolism
- F - Nucleotide transport and metabolism
- G - Carbohydrate transport and metabolism
- H - Coenzyme transport and metabolism
- I - Lipid transport and metabolism
- J - Translation, ribosomal structure and biogenesis
- K - Transcription
- L - Replication, recombination and repair
- M - Cell wall/membrane/envelope biogenesis
- N - Cell motility
- O - Posttranslational modification, protein turnover, chaperones
- P - Inorganic ion transport and metabolism
- Q - Secondary metabolites biosynthesis, transport and catabolism
- R - General function prediction only
- S - Function unknown
- T - Signal transduction mechanisms
- U - Intracellular trafficking, secretion, and vesicular transport
- V - Defense mechanisms

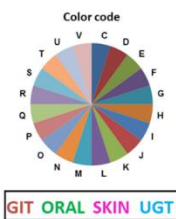

1. *Prevotella copri* DSM 18205
2. *Prevotella salivae* DSM 15606
3. *Prevotella stercorea* DSM 18206
4. *Prevotella buccae* ATCC 33574
5. *Prevotella buccae* D17
6. *Prevotella denticola* F0289
7. *Prevotella marshii* DSM 16973
8. *Prevotella melaninogenica* ATCC 25845
9. *Prevotella melaninogenica* D18
10. *Prevotella multiformis* DSM 16608
11. *Prevotella nigrescens* ATCC 33563
12. *Prevotella oris* F0302
13. *Prevotella oulorum* F0390
14. *Prevotella pallens* ATCC 700821
15. *Prevotella* sp. oral taxon 299 str. F0039
16. *Prevotella* sp. oral taxon 306 str. F0472
17. *Prevotella* sp. oral taxon 317 str. F0108
18. *Prevotella* sp. oral taxon 472 str. F0295
19. *Prevotella tannerae* ATCC 51259
20. *Prevotella veroralis* F0319
21. *Prevotella bergensis* DSM 17361
22. *Prevotella amnii* CRIS 21A-A
23. *Prevotella bivia* JCVIHMP010
24. *Prevotella buccalis* ATCC 35310
25. *Prevotella denticola* CRIS 18C-A
26. *Prevotella disiens* FB035-09AN
27. *Prevotella oralis* ATCC 33269
28. *Prevotella timonensis* CRIS 5C-B1

**Additional File 8: Figure S4 – Relative abundance and distribution pattern of COG categories within singletons.** The colored number above pie chart represents niches of respective *Prevotella* strain (brown: GIT, green: ORAL Cavity, purple: SKIN and blue: UGT).
